# Supplementary material for: Detection of Genomic Regions Associated with Resistance to Stem Rust in Russian Spring Wheat Varieties and Breeding Germplasm
Source: MDPI journal article supplement (doi:10.3390/ijms21134706), 2020-07-01
Supplement: s1 [file s1]

Table S3. Number of SNP markers with localizations in the A, B and D genomes used for association mapping.

| Genome | Chromosome |      |     |     |     |     |     | Total |
|--------|------------|------|-----|-----|-----|-----|-----|-------|
|        | 1          | 2    | 3   | 4   | 5   | 6   | 7   |       |
| A      | 605        | 555  | 545 | 446 | 644 | 638 | 704 | 4137  |
| B      | 799        | 1054 | 786 | 333 | 911 | 847 | 565 | 5295  |
| D      | 299        | 419  | 138 | 46  | 176 | 182 | 232 | 1492  |
