# Supplementary material for: Detection of Genomic Regions Associated with Resistance to Stem Rust in Russian Spring Wheat Varieties and Breeding Germplasm
Source: Int J Mol Sci. 2020 Jul 1;21(13):4706. doi: 10.3390/ijms21134706 (PMC7369787; doi:10.3390/ijms21134706)
Supplement: Supplementary file 1 [file ijms-21-04706-s001.zip]

Archive with 5 entries (5 files):
- Figure S1.xlsx
- Figure S2.pdf
- Table S1.xlsx
- Table S2.xlsx
- Table S3.pdf
