# Supplementary material for: Detection of Genomic Regions Associated with Resistance to Stem Rust in Russian Spring Wheat Varieties and Breeding Germplasm
Source: Int J Mol Sci. 2020 Jul 1;21(13):4706. doi: 10.3390/ijms21134706 (PMC7369787; doi:10.3390/ijms21134706)
Supplement: Supplementary file 1 [file ijms-21-04706-s001.zip › Figure S1.xlsx]

## Sheet: Figure S1
Figure S1. The dendrogram of genetic similarity of spring wheat genotypes constructed by the nearest neighbors algorithm based on genotyping data of SNP markers. The numbering of varieties corresponds to: 1- Kuibyshevskaya-2, 2 - Lutescens-840, 3 - Tulaikovskaya-belozernaya, 4 - Tulaikovskaya-stepnaya, 5 - Tulaikovskaya-zolotistaya, 6 - Tulaikovskaya-1, 7 - Tulaikovskaya-10, 8 - Kinelskaya-40, 9 …
