# Supplementary material for: Detection of Genomic Regions Associated with Resistance to Stem Rust in Russian Spring Wheat Varieties and Breeding Germplasm
Source: Int J Mol Sci. 2020 Jul 1;21(13):4706. doi: 10.3390/ijms21134706 (PMC7369787; doi:10.3390/ijms21134706)
Supplement: Supplementary file 1 [file ijms-21-04706-s001.zip › Table S1.xlsx]

## Sheet: Cultivars + breeding lines
	Table S1. List of spring wheat genotypes, their origin and stem rust severity (2016 - 2018).
No.	Variety name	Accession no. VIR (St. Petersburg, Russia)	Accession no. USDA (USA)	Region/Originator	Status	Year of release	Stem rust severity
							2016	2017	2018
1	Kuibyshevskaya-2	K-58028	-	Samarskaya Oblast / Samarskii NIISKH	Cultivar	1988	50S	50MS	30MR
2	Lutescens-840	K-59474	-		Breeding line	1987	40MS	5S	15MR
3	Lutescens-101	K-60905; K-64648	-		Cultivar	1994	5MR	0	0
4	Tulaikovskaya-belozernaya	K-62641	-		Cultivar	1995	10MR	5MR	0
5	Tulaikovskaya-stepnaya	K-62642	-		Cultivar	1998	40MR	30MS	5S
6	Tulaikovskaya-zolotistaya	K-63715	-		Cultivar	2006	5R	5MR	10MR
7	Tulaikovskaya-1	K-64256	-		Cultivar	1994	5R	0	0
8	Tulaikovskaya-10	K-63714	-		Cultivar	2003	0	0	0
9	Kinelskaya-40	K-60544	-		Breeding line	1975	5MS	5S	20MR
10	Kinelskaya-60	K-62643	PI-611612		Cultivar	1998	10MR	10MR	5MR
11	Volgouralskaya	K-62930	-		Cultivar	2001	0	5MR	0
12	Saratovskaya-29	K-40599	PI-404234	Saratovskaya Oblast / NIISKH Yugo-Vostoka	Cultivar	1957	70S	50MS	50S
13	Saratovskaya-42	K-48114	PI-404241		Cultivar	1973	20S	5S	20S
14	Lutescens-62	K-15183	PI-280446		Cultivar	1924	30S	5S	10S
15	Lutescens-80	K-63452	-	Altaiskii Krai / Altaiskii NIIZIS	Breeding line	-	5MS	5S	15MR
16	Lutescens-85	K-63453	-		Breeding line	-	50MS	10MR	5MR
17	Lutescens-148	K-63454	-		Breeding line	-	60S	30MS	15MR
18	Altaiskii-prostor	K-64454	-		Cultivar	1997	5MR	5MR	15MR
19	Altaiskaya-92	K-64693	PI-639485		Cultivar	1997	40S	15MR	5MR
20	Altaiskaya-99	K-64456	-		Cultivar	2005	60S	50S	15MS
21	Altaiskaya-100	K-64661	PI-639455		Cultivar	2005	5S	30MS	15MS
22	Altaiskaya-325	K-64373	PI-639447		Cultivar	2004	50S	60MS	20MS
23	Altaiskaya-530	K-64662	-		Cultivar	2007	70S	5S	30MS
24	Erythrospermum-72	K-63456	-		Breeding line	-	0	10MR	0
25	Sibirskaya-12	K-64668	-	Novosibirskaya Oblast / SibNIIRS	Cultivar	2006	50MS	5MR	50MS
26	Novosibirskaya-15	K-64257	-		Cultivar	2003	20S	10MS	50MS
27	Novosibirskaya-22	K-58147	PI-592028		Cultivar	1991	30MS	10MS	5MS
28	Novosibirskaya-29	K-64258	-		Cultivar	2003	30S	50S	50MS
29	Novosibirskaya-67	K-48601	PI-404242		Cultivar	1974	80MS	50S	30MS
30	Novosibirskaya-81	K-55582; K-59460	PI-592027		Cultivar	1986	5MR	50S	30MR
31	Novosibirskaya-89	K-61004	-		Cultivar	1993	50S	50S	10MS
32	Novosibirskaya-91	K-64859	-		Cultivar	2002	40MS	5S	15MR
33	Lutescens-25	K-58442	-		Cultivar	1990	40MR	5MR	0
34	Obskaya-14	K-64363	-		Cultivar	1990	10MS	20S	50MS
35	Kantegirskaya-89	K-62317	PI-592029		Cultivar	1993	10MS	40S	40MS
36	Aleksandrina	K-64855	-		Cultivar	2007	60MS	5S	5MR
37	Udacha	K-64372	-		Cultivar	2006	25MS	10S	5S
38	Polyushko	K-64856	-		Cultivar	2008	30S	15S	10S
39	Baganskaya-93	K-64467	-		Cultivar	1999	40S	70S	40MS
40	Obskaya-2	-	-		Cultivar	2014	70S	20MS	30S
41	Sirena	K-61519	-	Krasnoyarskii krai / Krasnoyarskii NIISKH	Cultivar	1992	15MS	50MS	5MS
42	Krasa-2	K-64471	-		Cultivar	2002	15MS	5MR	0
43	Krasnoyarskaya-90	K-61216	-		Cultivar	1991	40MS	15MR	0
44	Vesnyanka-8	K-63065	-		Cultivar	1990	30S	50S	60S
45	Albidum-73	K-60534	-		Cultivar	1963	5MR	0	50MS
46	Rybinskaya-127	K-60536	-		Cultivar	1990	5MR	15MR	15MR
47	Kazachka	K-64114	-		Cultivar	2001	30S	5S	10MR
48	Angarida	K-64116	-		Cultivar	2002	30MS	5S	10MR
49	Mana-2	K-64115	-		Cultivar	2005	10MS	5S	5MS
50	Tuleevskaya	K-63461	-	Kemerovskaya Oblast / Kemerovskii NIISKH	Cultivar	2002	10MS	10MR	40MS
51	Izida	K-64457	-		Cultivar	2002	10MR	40MR	10MS
52	Mariya	K-63200	-		Cultivar	1999	10S	15MR	15MR
53	AN-34	K-63720	-		Cultivar	2002	40S	80S	60S
54	Mariinka	K-63718	-		Cultivar	2006	30MS	5S	15MR
55	Salimovka	K-63719	-		Cultivar	2001	40MS	5MR	0
56	Kiiskaya	-	-		Breeding line	2001	10S	5S	50MS
57	Nostalgiya	K-63721	-		Cultivar	2001	10MR	10MR	30MR
58	Aleshina	K-63199	-		Cultivar	2003	60S	15S	20MS
59	Darnitsa	K-64659	-		Cultivar	2008	50S	40MS	15MR
60	Serebrina	K-64695	-	Tyumenskaya Oblast / NIISKH Severnogo Zauralya	Cultivar	2000	15MS	5S	5MS
61	Rechka	K-64370	-		Cultivar	2000	15MS	10MS	15MR
62	Latona	K-64359	-		Cultivar	2000	10MS	50S	10MR
63	Provintsiya	K-64999	-		Cultivar	2002	40MS	10MR	0
64	Bel	K-64664	-		Cultivar	2008	15MS	5S	15MR
65	Ustya	K-62939	-		Cultivar	1999	20MR	15MR	15MR
66	Chernyava-13	K-62938	-		Cultivar	2000	70S	60MS	70S
67	Zlatozara	K-62937	-		Cultivar	1999	50S	5S	30MS
68	Tyumenskaya-99	K-64368	-		Cultivar	2000	10MS	10MR	30MS
69	Ikar	K-64255	-		Cultivar	2001	5S	80S	30MS
70	Skent-1	K-64365	-		Cultivar	1998	30MS	20MS	20MS
71	Ilinskaya	K-64366	-		Cultivar	1997	10MR	5MR	10MR
72	Turinskaya	K-64367	-		Cultivar	1995	40MS	80S	10MR
73	Surenta-1	K-64360	-		Cultivar	2000	20S	15MS	30MR
74	Surenta-4	K-64375	-		Cultivar	2002	5MS	5S	15MR
75	Surenta-5	K-64376	-		Cultivar	2002	10MR	15S	30MR
76	Surenta-6	K-64465	-		Cultivar	2003	5MS	5S	15MR
77	Surenta-7	K-64466	-		Cultivar	2003	10S	5MS	15MR
78	Dias-2	K-59025	PI-592039	Omskaya Oblast / Sibirskii NIISKH	Cultivar	1987	15MS	5S	40MS
79	Irtyshanka-10	K-52725, K-51898	PI-572627		Cultivar	1981	80S	50S	50MS
80	Katyusha	K-64665	-		Cultivar	2008	5MR	15MR	15MR
81	Tarskaya-6	K-64464	-		Cultivar	2002	15MR	10MR	0
82	Sonata	K-64691	-		Cultivar	2002	30S	5MS	30MS
83	Strada-Sibiri	K-62944	-		Cultivar	2002	0	5MR	10MR
84	Otrada-Sibiri	K-62943	-		Cultivar	1998	30S	5MS	30MS
85	Tertsiya	K-62639	-		Cultivar	1995	5MR	10MR	10MR
86	Priirtyshskaya-86	K-63464	-		Cultivar	1986	10MR	5MR	0
87	Rosinka-2	K-63208	-		Cultivar	1999	20MS	30MR	40MR
88	Omskaya-20	K-61189	-		Cultivar	1993	0	0	15MR
89	Omskaya-23	K-64992	-		Cultivar	1997	60S	5S	60S
90	Omskaya-24	K-64118	PI-639475		Cultivar	1996	10MS	5MR	50MS
91	Omskaya-26	K-63201	-		Cultivar	1998	25MS	15MR	0
92	Omskaya-28	K-63202	PI-639467		Cultivar	1997	30MR	10MS	30MR
93	Omskaya-29	K-63203	PI-639473		Cultivar	1999	10MS	5MR	30MR
94	Omskaya-31	K-62867	PI-639474		Cultivar	2000	30MS	10MR	20MS
95	Omskaya-32	K-63205	-		Cultivar	2001	50S	5MR	5R
96	Omskaya-33	K-63206	PI-639472		Cultivar	2002	40S	5S	5S
97	Omskaya-34	K-64458	-		Cultivar	2001	5MR	10MS	10MS
98	Omskaya-36	K-64667	-		Cultivar	2007	15MS	50S	30MS
99	Skala	K-41173	PI-262648	Irkutskaya oblast / Tulunskaya GSS	Cultivar	1956	80S	70S	50S
100	Tulun-15	K-64599	-		Cultivar	1998	70S	20MS	80MS
101	Tselinnaya-20	K-48286	-	Kazakhstan	Cultivar	1978	80MS	50MS	50MS
102	Pitic-62	K-45664	PI-342644	Mexica	Cultivar	1962	5R	0	0
103	Rassvet	K-64646	-	Belarus	Cultivar	2004	70MS	80MS	40MS
104	Belorusskaya-80	K-59387	PI-592024	Belarus	Cultivar	1983	80S	60MS	80MS
105	Festivalnaya	-	-	Belarus	Cultivar	-	80MS	80MS	50MS

## Sheet: Introgression lines
	Table S1. List of spring wheat genotypes, their origin and stem rust severity (2016 - 2018).
No.	Line	Cross combination	Originators	Stem rust severity
				2016	2017	2018
1	744	Saratovskaya-29/Triticum timopheevii	Institute of Cytology and Genetics SB RAS, Novosibirsk, Russia	5R	0	0
2	760			5R	0	0
3	811			5R	5R	1R
4	821			5R	1R	0
5	832			1R	1R	0
6	837			10R	0	5R
7	842			0	0	0
8	141	Skala/Triticum timopheevii		10MR	10MR	5MR
9	157			10MR	0	5MR
10	175			10MR	10MR	5MR
11	178			10MR	10MR	5MR
12	184			10MR	10MR	5MR
13	10	Irtishanka-10/Triticum timopheevii		10MR	10MR	5R
14	28			10R	5R	5R
15	38			10MR	10R	5R
16	67			10MR	5MR	5MR
17	94			40MS	40MR	20MR
18	140			15MR	15MR	5MR
19	191	Tselinnaya-20/Triticum timopheevii		10MR	10MR	5MR
20	199			10MR	10MR	5MR
21	206			40MR	20MR	10MR
22	208			30MR	30MR	10MR
23	676	Novosibirskaya-67/Triticum timopheevii		10MR	5R	5R
24	699			30MR	10MR	10MR
25	728			80MS	70MS	70MS
26	732			30MR	30MR	20MR
27	183/2-2	Chinese Spring/Triticum durum	Institute of Genetics and Cytology, Minsk, Republic of Belarus	90S	70MS	80MS
28	190/4-1	Triticum durum/Chinese Spring		80MS	70MS	60MS
29	190/5-3			70S	80MS	70MS
30	190/6-1			80S	60MS	70MS
31	191/3-3			80S	60MS	70MS
32	195-3			80S	60MS	80MS
33	196-1			80MS	50MR	50MS
34	200-3			80MS	60MS	40MS
35	202-2			60S	80MS	50MS
36	206-2	Pitic-62/Triticum dicoccum		80S	50MS	50S
37	213-1			80MS	60MS	60MS
38	221-1	Triticum durum/Belorusskaya-80		5R	0	0
39	226-7			80S	50MS	40MS
40	31	Rassvet/Triticum kiharae		60S	80MS	50MS
41	19	Triticum kiharae/Saratovskaya-29		80S	70MS	50MS
42	20-1			80MS	60MS	60MS
43	25-2			0	0	0
44	28			60MS	70MS	20MS
45	34-1			0	0	0
46	29	Rassvet/Triticum dicoccoides		80MS	70MS	70MS
47	13-3	Triticum dicoccoides/Festivalnaya		60MS	50MS	20MS
48	15-7			80S	50MS	70MS
49	16-5			10R	5R	10R
50	Triticum dicoccoides		K-5196, Israel	5MR	10MR	0
51	Triticum dicoccum		K-45926	50MR	40MR	40MR
52	Triticum timopheevii		K-29551, Georgia	0	0	0
53	Triticum kiharae		K-47897, Japan	0	0	0
