# Supplementary material for: Detection of Genomic Regions Associated with Resistance to Stem Rust in Russian Spring Wheat Varieties and Breeding Germplasm
Source: Int J Mol Sci. 2020 Jul 1;21(13):4706. doi: 10.3390/ijms21134706 (PMC7369787; doi:10.3390/ijms21134706)
Supplement: Supplementary file 1 [file ijms-21-04706-s001.zip › Table S2.xlsx]

## Sheet: Q7
Table S2. Clusterisation of the wheat genotypes based on the results of STRUCTURE analysis.
No	Genotype	Q1	Q2	Q3	Q4	Q5	Q6	Q7
1	Kuibyshevskaya-2	0.262	0.002	0.284	0.011	0.104	0.015	0.322
2	Lutescens-840	0.001	0.605	0.002	0.001	0.001	0.003	0.387
3	Lutescens-101	0.003	0.001	0.991	0.002	0.001	0.001	0.002
4	Tulaikovskaya-belozernaya	0.265	0.722	0.006	0.004	0.001	0.002	0.001
5	Tulaikovskaya-stepnaya	0.004	0.567	0.393	0.030	0.001	0.004	0.001
6	Tulaikovskaya-zolotistaya	0.001	0.001	0.688	0.002	0.002	0.001	0.305
7	Tulaikovskaya-1	0.002	0.041	0.534	0.001	0.271	0.003	0.147
8	Tulaikovskaya-10	0.019	0.002	0.606	0.004	0.007	0.002	0.360
9	Kinelskaya-40	0.023	0.001	0.665	0.219	0.009	0.077	0.006
10	Kinelskaya-60	0.004	0.486	0.505	0.001	0.002	0.001	0.001
11	Volgouralskaya	0.140	0.041	0.638	0.005	0.015	0.002	0.160
12	Saratovskaya-29	0.003	0.043	0.942	0.009	0.001	0.001	0.001
13	Saratovskaya-42	0.003	0.061	0.827	0.002	0.001	0.001	0.105
14	Lutescens-62	0.056	0.123	0.696	0.005	0.004	0.002	0.115
15	Lutescens-80	0.006	0.088	0.296	0.004	0.261	0.324	0.021
16	Lutescens-85	0.070	0.001	0.658	0.008	0.186	0.051	0.026
17	Lutescens-148	0.001	0.575	0.001	0.002	0.001	0.419	0.001
18	Altaiskii-prostor	0.038	0.001	0.011	0.003	0.008	0.631	0.308
19	Altaiskaya-92	0.004	0.001	0.545	0.002	0.002	0.002	0.445
20	Altaiskaya-99	0.001	0.001	0.001	0.001	0.002	0.160	0.833
21	Altaiskaya-100	0.050	0.040	0.397	0.003	0.081	0.229	0.201
22	Altaiskaya-325	0.008	0.304	0.370	0.002	0.005	0.004	0.308
23	Altaiskaya-530	0.005	0.067	0.424	0.003	0.003	0.200	0.299
24	Erythrospermum-72	0.006	0.001	0.347	0.061	0.391	0.017	0.178
25	Sibirskaya-12	0.008	0.535	0.105	0.012	0.013	0.017	0.310
26	Novosibirskaya-15	0.003	0.001	0.331	0.124	0.003	0.533	0.006
27	Novosibirskaya-22	0.041	0.003	0.299	0.021	0.167	0.464	0.005
28	Novosibirskaya-29	0.001	0.434	0.001	0.001	0.001	0.001	0.561
29	Novosibirskaya-67	0.023	0.001	0.098	0.112	0.002	0.053	0.712
30	Novosibirskaya-81	0.085	0.538	0.318	0.004	0.001	0.002	0.052
31	Novosibirskaya-89	0.003	0.001	0.009	0.378	0.001	0.003	0.606
32	Novosibirskaya-91	0.009	0.001	0.473	0.002	0.175	0.002	0.340
33	Lutescens-25	0.001	0.007	0.001	0.001	0.001	0.985	0.004
34	Obskaya-14	0.001	0.104	0.001	0.001	0.004	0.129	0.760
35	Kantegirskaya-89	0.003	0.027	0.005	0.322	0.001	0.002	0.640
36	Aleksandrina	0.141	0.001	0.011	0.003	0.072	0.034	0.738
37	Udacha	0.004	0.001	0.092	0.002	0.261	0.002	0.638
38	Polyushko	0.003	0.001	0.342	0.114	0.003	0.529	0.009
39	Baganskaya-93	0.014	0.025	0.015	0.007	0.347	0.100	0.491
40	Obskaya-2	0.063	0.001	0.374	0.005	0.261	0.003	0.293
41	Sirena	0.004	0.194	0.002	0.002	0.195	0.009	0.595
42	Krasa-2	0.132	0.069	0.013	0.010	0.029	0.597	0.150
43	Krasnoyarskaya-90	0.002	0.610	0.002	0.002	0.001	0.003	0.380
44	Vesnyanka-8	0.002	0.374	0.021	0.007	0.001	0.594	0.002
45	Albidum-73	0.007	0.291	0.072	0.002	0.178	0.002	0.447
46	Rybinskaya-127	0.009	0.001	0.009	0.002	0.534	0.137	0.309
47	Kazachka	0.013	0.362	0.200	0.003	0.001	0.295	0.125
48	Angarida	0.010	0.001	0.052	0.003	0.282	0.507	0.146
49	Mana-2	0.003	0.692	0.065	0.031	0.001	0.002	0.205
50	Tuleevskaya	0.239	0.001	0.022	0.003	0.018	0.002	0.716
51	Izida	0.001	0.226	0.003	0.001	0.081	0.005	0.682
52	Mariya	0.127	0.797	0.063	0.002	0.001	0.003	0.008
53	AN-34	0.002	0.223	0.001	0.002	0.003	0.124	0.645
54	Mariinka	0.002	0.458	0.003	0.001	0.001	0.002	0.533
55	Salimovka	0.015	0.001	0.118	0.002	0.014	0.832	0.017
56	Kiiskaya	0.026	0.053	0.008	0.045	0.007	0.177	0.684
57	Nostalgiya	0.061	0.151	0.008	0.005	0.005	0.049	0.720
58	Aleshina	0.110	0.310	0.145	0.002	0.102	0.002	0.329
59	Darnitsa	0.235	0.001	0.044	0.028	0.412	0.165	0.115
60	Serebrina	0.202	0.255	0.348	0.003	0.108	0.064	0.019
61	Rechka	0.127	0.685	0.168	0.003	0.001	0.012	0.005
62	Latona	0.080	0.004	0.532	0.002	0.127	0.003	0.252
63	Provintsiya	0.005	0.001	0.070	0.106	0.088	0.319	0.411
64	Bel	0.025	0.469	0.168	0.003	0.002	0.314	0.019
65	Ustya	0.021	0.100	0.063	0.001	0.167	0.630	0.017
66	Chernyava-13	0.006	0.001	0.216	0.007	0.004	0.301	0.466
67	Zlatozara	0.002	0.002	0.102	0.458	0.186	0.026	0.225
68	Tyumenskaya-99	0.003	0.001	0.001	0.002	0.125	0.684	0.185
69	Ikar	0.171	0.001	0.286	0.011	0.342	0.137	0.052
70	Skent-1	0.170	0.001	0.587	0.062	0.166	0.002	0.012
71	Ilinskaya	0.008	0.062	0.671	0.023	0.105	0.039	0.091
72	Turinskaya	0.002	0.849	0.003	0.020	0.004	0.121	0.001
73	Surenta-1	0.367	0.003	0.079	0.003	0.474	0.012	0.062
74	Surenta-4	0.004	0.008	0.563	0.002	0.122	0.010	0.290
75	Surenta-5	0.002	0.336	0.633	0.002	0.001	0.001	0.025
76	Surenta-6	0.013	0.487	0.379	0.002	0.001	0.001	0.116
77	Surenta-7	0.002	0.478	0.022	0.012	0.039	0.002	0.446
78	Dias-2	0.001	0.266	0.001	0.001	0.001	0.730	0.001
79	Irtyshanka-10	0.003	0.001	0.177	0.814	0.001	0.002	0.003
80	Katyusha	0.309	0.157	0.495	0.020	0.003	0.010	0.006
81	Tarskaya-6	0.163	0.029	0.259	0.006	0.061	0.139	0.344
82	Sonata	0.274	0.135	0.012	0.003	0.001	0.001	0.574
83	Strada-Sibiri	0.007	0.881	0.037	0.002	0.006	0.059	0.008
84	Otrada-Sibiri	0.007	0.311	0.077	0.144	0.125	0.238	0.098
85	Tertsiya	0.001	0.604	0.001	0.001	0.001	0.171	0.221
86	Priirtyshskaya-86	0.004	0.001	0.007	0.070	0.144	0.772	0.003
87	Rosinka-2	0.004	0.609	0.162	0.002	0.009	0.011	0.203
88	Omskaya-20	0.039	0.001	0.616	0.025	0.205	0.110	0.005
89	Omskaya-23	0.001	0.553	0.001	0.001	0.001	0.001	0.442
90	Omskaya-24	0.001	0.642	0.001	0.002	0.001	0.352	0.001
91	Omskaya-26	0.001	0.001	0.001	0.001	0.001	0.994	0.001
92	Omskaya-28	0.008	0.001	0.534	0.060	0.002	0.002	0.394
93	Omskaya-29	0.004	0.424	0.396	0.171	0.001	0.002	0.002
94	Omskaya-31	0.002	0.839	0.001	0.028	0.043	0.005	0.082
95	Omskaya-32	0.014	0.643	0.211	0.003	0.006	0.001	0.123
96	Omskaya-33	0.027	0.032	0.600	0.007	0.016	0.009	0.309
97	Omskaya-34	0.002	0.017	0.632	0.056	0.001	0.289	0.002
98	Omskaya-36	0.006	0.009	0.601	0.025	0.084	0.273	0.003
99	Skala	0.001	0.001	0.001	0.001	0.001	0.996	0.001
100	Tulun-15	0.006	0.001	0.068	0.040	0.224	0.450	0.212
101	Tselinnaya-20	0.990	0.001	0.004	0.001	0.001	0.001	0.001
102	Pitic-62	0.007	0.001	0.147	0.064	0.610	0.009	0.163
103	Rassvet	0.002	0.001	0.003	0.005	0.529	0.092	0.369
104	Belorusskaya-80	0.002	0.001	0.001	0.001	0.986	0.006	0.002
105	Festivalnaya	0.002	0.001	0.001	0.001	0.988	0.006	0.002
106	744	0.246	0.002	0.646	0.009	0.015	0.063	0.018
107	760	0.005	0.000	0.754	0.238	0.001	0.001	0.001
108	811	0.005	0.001	0.875	0.117	0.001	0.001	0.001
109	821	0.006	0.001	0.537	0.453	0.001	0.001	0.001
110	832	0.009	0.000	0.581	0.407	0.001	0.001	0.001
111	837	0.070	0.001	0.431	0.455	0.039	0.002	0.001
112	842	0.003	0.000	0.590	0.404	0.001	0.001	0.001
113	141	0.001	0.001	0.001	0.002	0.001	0.994	0.001
114	157	0.311	0.040	0.002	0.133	0.004	0.002	0.509
115	175	0.001	0.000	0.001	0.002	0.001	0.994	0.001
116	178	0.001	0.001	0.001	0.004	0.001	0.990	0.001
117	184	0.001	0.000	0.001	0.002	0.001	0.994	0.001
118	10	0.002	0.000	0.002	0.993	0.001	0.001	0.001
119	28	0.002	0.001	0.002	0.993	0.001	0.001	0.001
120	38	0.004	0.001	0.004	0.986	0.003	0.001	0.002
121	67	0.001	0.001	0.002	0.972	0.001	0.022	0.001
122	94	0.017	0.001	0.003	0.915	0.041	0.023	0.001
123	140	0.002	0.001	0.002	0.991	0.001	0.002	0.001
124	191	0.990	0.001	0.001	0.006	0.001	0.001	0.001
125	199	0.817	0.001	0.002	0.071	0.107	0.002	0.001
126	206	0.993	0.001	0.001	0.002	0.001	0.001	0.001
127	208	0.990	0.001	0.002	0.004	0.001	0.001	0.001
128	676	0.003	0.002	0.001	0.148	0.002	0.001	0.843
129	699	0.054	0.001	0.001	0.066	0.012	0.010	0.857
130	728	0.300	0.001	0.006	0.022	0.160	0.163	0.348
131	732	0.004	0.001	0.002	0.148	0.119	0.022	0.705
132	183/2-2	0.668	0.001	0.325	0.002	0.001	0.001	0.002
133	190/4-1	0.161	0.001	0.077	0.010	0.595	0.052	0.105
134	190/5-3	0.042	0.001	0.011	0.004	0.643	0.005	0.294
135	190/6-1	0.002	0.001	0.001	0.001	0.988	0.005	0.002
136	191/3-3	0.079	0.001	0.157	0.003	0.452	0.114	0.194
137	195-3	0.003	0.001	0.031	0.006	0.497	0.025	0.438
138	196-1	0.002	0.001	0.020	0.009	0.479	0.017	0.473
139	200-3	0.012	0.002	0.003	0.003	0.752	0.107	0.121
140	202-2	0.046	0.001	0.029	0.022	0.666	0.004	0.232
141	206-2	0.056	0.002	0.009	0.006	0.611	0.003	0.312
142	213-1	0.002	0.001	0.001	0.001	0.983	0.009	0.002
143	221-1	0.003	0.001	0.003	0.008	0.794	0.108	0.084
144	226-7	0.007	0.001	0.041	0.038	0.825	0.087	0.002
145	31	0.002	0.001	0.004	0.004	0.529	0.072	0.388
146	19	0.006	0.002	0.013	0.047	0.468	0.004	0.460
147	20-1	0.002	0.110	0.001	0.002	0.526	0.010	0.349
148	25-2	0.003	0.016	0.002	0.053	0.526	0.002	0.398
149	28	0.022	0.012	0.003	0.018	0.675	0.174	0.097
150	34-1	0.004	0.002	0.004	0.012	0.931	0.004	0.044
151	29	0.002	0.023	0.003	0.006	0.593	0.023	0.351
152	13-3	0.002	0.001	0.002	0.003	0.782	0.005	0.205
153	15-7	0.012	0.001	0.063	0.011	0.851	0.043	0.020
154	16-5	0.004	0.001	0.008	0.023	0.821	0.002	0.142
155	Triticum dicoccoides	0.146	0.001	0.003	0.143	0.700	0.005	0.002
156	Triticum dicoccum	0.008	0.002	0.017	0.262	0.704	0.005	0.003
157	Triticum timopheevii	0.004	0.000	0.004	0.344	0.643	0.003	0.001
158	Triticum kiharae	0.002	0.001	0.002	0.285	0.705	0.003	0.002
