# Supplementary figures and images for: Detection of Genomic Regions Associated with Resistance to Stem Rust in Russian Spring Wheat Varieties and Breeding Germplasm
Source: MDPI journal article supplement (doi:10.3390/ijms21134706), 2020-07-01

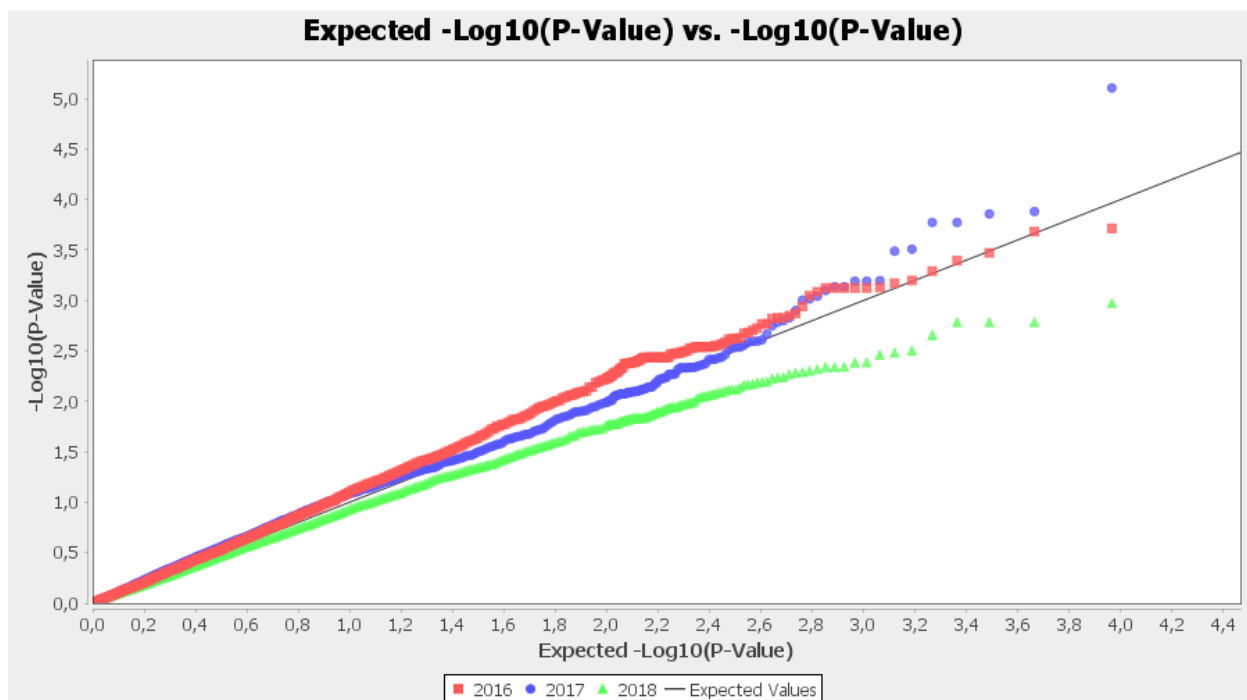

Figure S2. The quantile-quantile plot for MLM model.

Supplement: s1 [file s1]
